# Supplementary material for: Synthesis of colloidal MnAsxSb1−x nanoparticles: compositional inhomogeneity and magnetic consequences
Source: Royal Society of Chemistry journal article supplement (doi:10.1039/d1tc02479e), 2021-01-01
Supplement: d1tc02479e1.pdf [file d1tc02479e1.pdf]

## Electronic Supplementary Information

### Synthesis of Colloidal $\text{MnAs}_x\text{Sb}_{1-x}$ Nanoparticles: Compositional Inhomogeneity and Magnetic Consequences

Malsha A. Hettiarachchi,<sup>1</sup> Tepora Su'a,<sup>1</sup> Ehab Abdelhamid,<sup>2</sup> Shiva Pokhrel,<sup>2</sup> Boris Nadgorny,<sup>2</sup>

Stephanie L. Brock<sup>1</sup>

<sup>1</sup>Department of Chemistry, Wayne State University, Detroit, MI, 48202 USA

<sup>2</sup>Department of Physics and Astronomy, Wayne State University, Detroit, MI 48201, USA

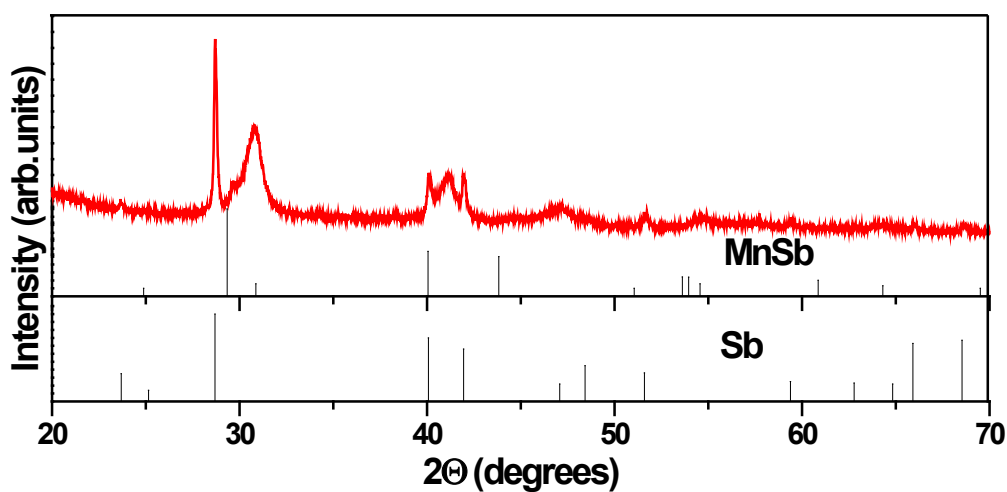

**Fig. S1:** PXRD pattern of initial synthesis of  $\text{MnAs}_{0.5}\text{Sb}_{0.5}$  nanoparticles (target composition) using 1.1 mmol of Mn and heating the reaction mixture at 250 °C for 3 h (MnSb-PDF#-03-065-0388, Sb-PDF#-00-035-0732)

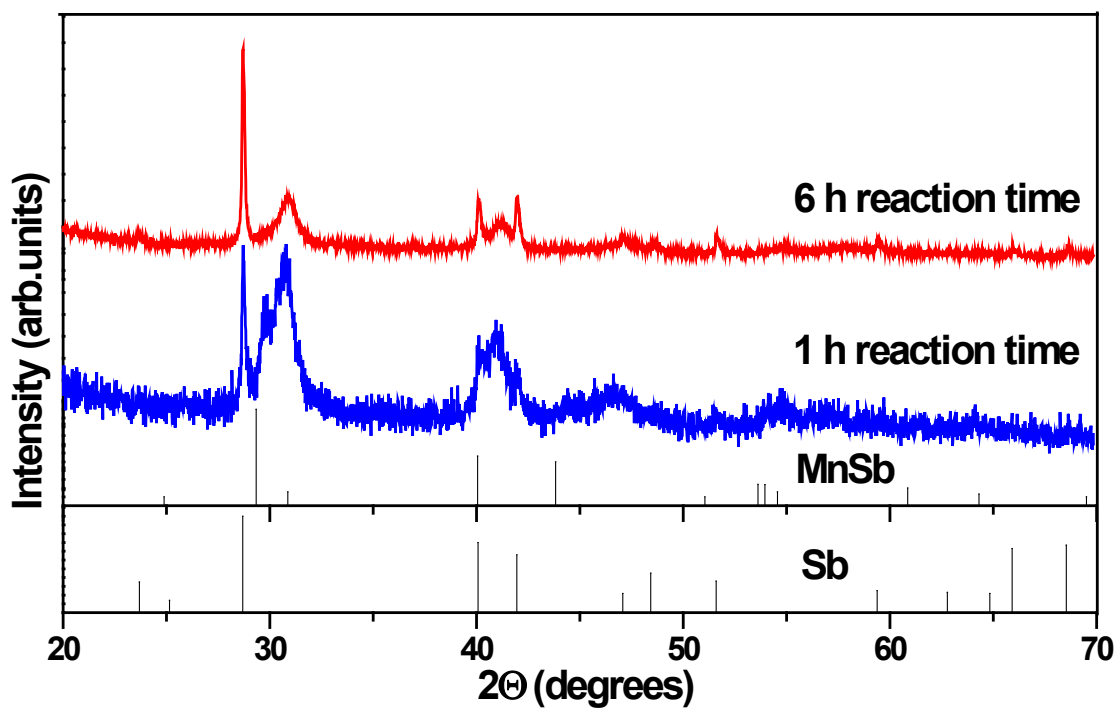

**Fig. S2:** PXRD patterns of the syntheses showing the effect of reaction time when heated at 250 °C in the presence of 1.1 mmol of Mn . (MnSb-PDF#-03-065-0388, Sb-PDF#-00-035-0732)

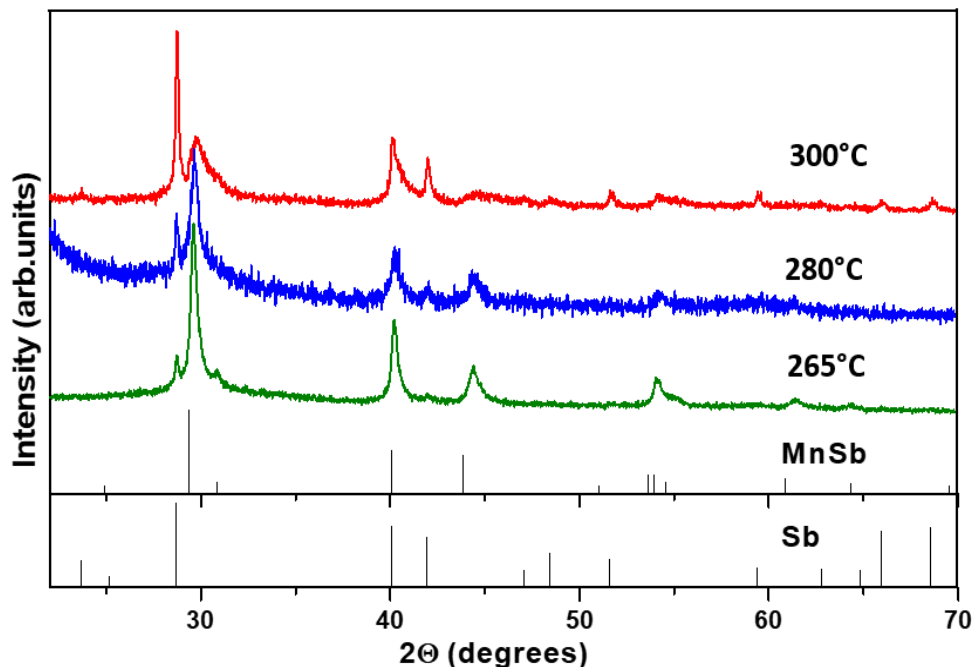

**Fig. S3:** PXRD patterns of the syntheses showing the effect of reaction temperature towards the  $\text{MnAs}_{0.5}\text{Sb}_{0.5}$  nanoparticles (target composition) synthesis in the presence of 1.1 mmol of Mn and heated for 3 h (MnSb-PDF#-03-065-0388, Sb-PDF#-00-035-0732)

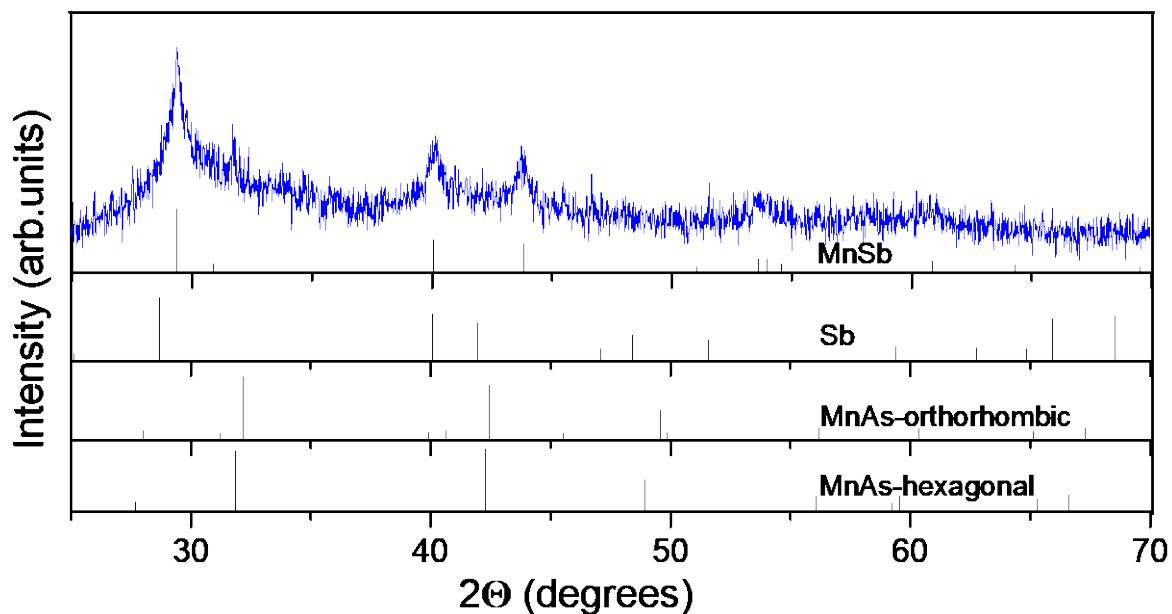

**Fig. S4:** PXRD pattern of the synthesis in the presence of  $\text{NaBH}_4$  showing the phase segregation in composition  $\text{MnAs}_{0.5}\text{Sb}_{0.5}$  nanoparticles (target composition) (MnSb-PDF#-03-065-0388, Sb-PDF#-00-035-0732, MnAs (hexagonal)- PDF#-00-028-0644, MnAs (orthorhombic)- PDF#-01-071-0923)

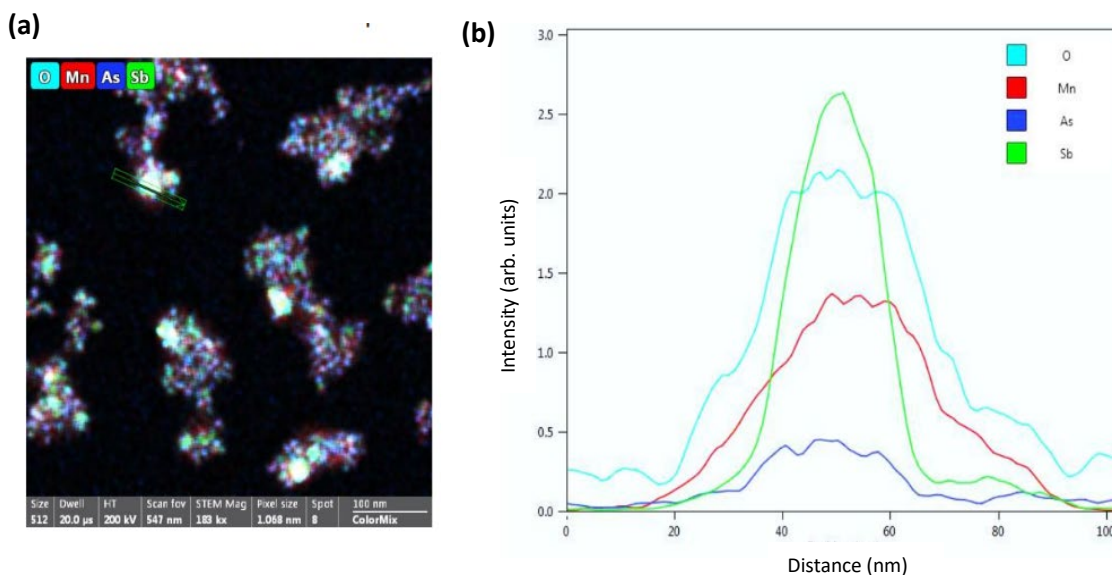

**Fig. S5:** (a) Elemental mapping analysis of nanoparticles of observed composition  $\text{MnAs}_{0.48}\text{Sb}_{0.52}$ . (targeted composition:  $\text{MnAs}_{0.70}\text{Sb}_{0.30}$ ) (b) The line scan elemental analysis is obtained through a cluster of  $\text{MnAs}_{0.48}\text{Sb}_{0.52}$  nanoparticles along the black line (upper left, **Fig S5a**). Color code: Mn (red), As (blue), Sb (green), and O (yellow)

**Table S1:** Paramagnetic slopes subtracted from raw data to produce data in **Fig. 11** according to Equations S1-S4.

| -                                  | -                                    | Slope at 50 K                     | Slope at 300 K                    |
|------------------------------------|--------------------------------------|-----------------------------------|-----------------------------------|
| Target composition                 | Actual composition                   | $\chi_{\text{para}}$ (emu/mol Mn) | $\chi_{\text{para}}$ (emu/mol Mn) |
| $\text{MnAs}_{0.1}\text{Sb}_{0.9}$ | $\text{MnAs}_{0.03}\text{Sb}_{0.95}$ | 0.04679                           | 0.02344                           |
| $\text{MnAs}_{0.2}\text{Sb}_{0.8}$ | $\text{MnAs}_{0.08}\text{Sb}_{0.92}$ | 0.06085                           | 0.03226                           |
| $\text{MnAs}_{0.3}\text{Sb}_{0.7}$ | $\text{MnAs}_{0.12}\text{Sb}_{0.88}$ | 0.03571                           | 0.01060                           |
| $\text{MnAs}_{0.5}\text{Sb}_{0.5}$ | $\text{MnAs}_{0.31}\text{Sb}_{0.69}$ | 0.06246                           | 0.03187                           |
| $\text{MnAs}_{0.7}\text{Sb}_{0.3}$ | $\text{MnAs}_{0.52}\text{Sb}_{0.48}$ | 0.04871                           | 0.01797                           |
| $\text{MnAs}_{0.8}\text{Sb}_{0.2}$ | $\text{MnAs}_{0.48}\text{Sb}_{0.52}$ | 0.03341                           | 0.01322                           |
| $\text{MnAs}_{0.9}\text{Sb}_{0.1}$ | $\text{MnAs}_{0.85}\text{Sb}_{0.15}$ | 0.09683                           | 0.02952                           |

Eq S1:  $M_{\text{total}} = M_{\text{para}} + M_{\text{ferro}}$

Eq S2:  $M_{\text{total}} = \chi_{\text{para}}(H) + M_{\text{ferro}}$

Eq S3:  $y = mx + b$ ;  $m = \chi_{\text{para}}$

Eq S4:  $M_{\text{ferro}} = M_{\text{total}} - \chi_{\text{para}}(H)$
